# Supplementary material
Source: PubMed Central journal article supplement (PMC8761479)
Supplement: NIHMS1751784-supplement-2.pdf [file NIHMS1751784-supplement-2.pdf]

## **Supplemental Information**

### **Increased ACTL6A Occupancy Within mSWI/SNF Chromatin**

### **Remodelers Drives Human Squamous Cell Carcinoma**

**Chiung-Ying Chang, Zohar Shipony, Sherry G. Lin, Ann Kuo, Xiaochen Xiong, Kyle M. Loh, William J. Greenleaf, Gerald R. Crabtree**

**SUPPLEMENTAL FIGURES**

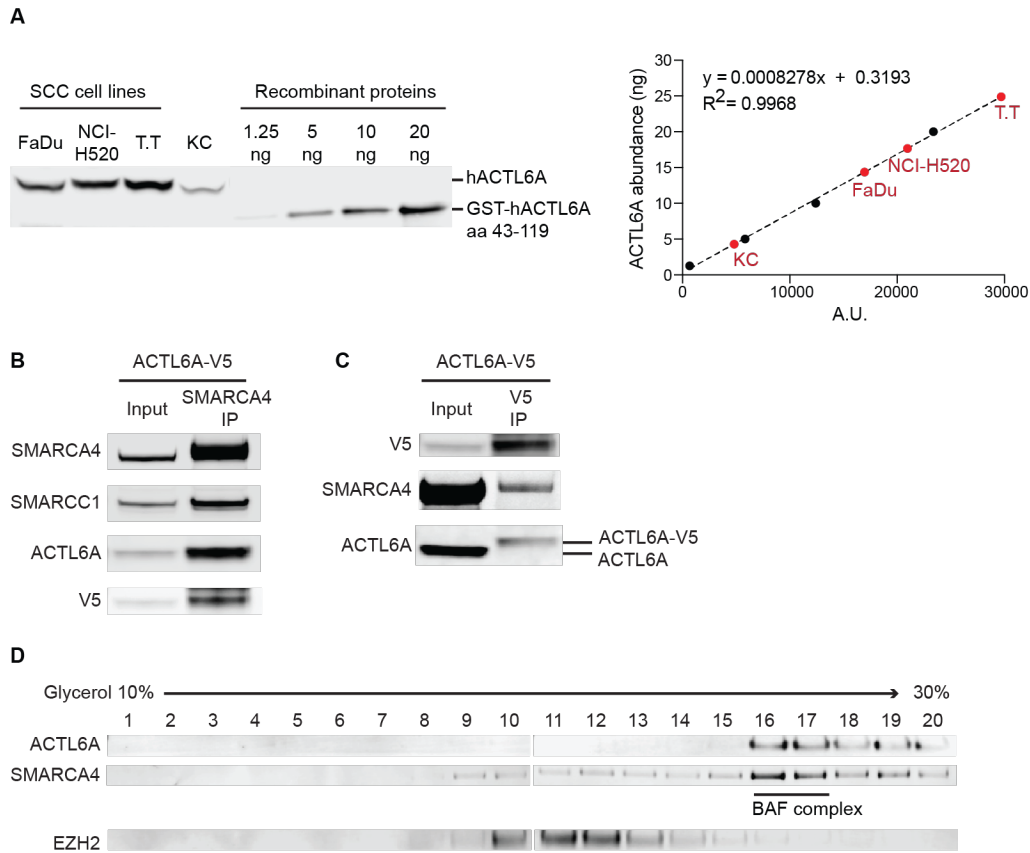

**Figure S1. *ACTL6A* overexpression does not induce its dimerization and most of *ACTL6A* proteins associate with BAF complexes in SCC cells. Related to Figure 2.**

(A) Left: Western blots for whole cell lysates from 300,000 cells of indicated cell lines and *ACTL6A* recombinant proteins. SCC cell lines: FaDu (head-and-neck), NCI-H520 (lung), and T.T (esophageal). KC: primary normal human keratinocytes. Right: Quantifications for Western blots. A.U.: arbitrary unit of Western blot integrated intensity. Linear regression line was generated from serially diluted *ACTL6A* recombinant proteins (black circles) and used for calculating *ACTL6A* abundance (ng) in cells (red circles). (B) Co-IP by SMARCA4 antibody using nuclear extracts from FaDu SCC cells infected with lentivirus expressing C-terminal V5-tagged *ACTL6A*. Note the incorporation of *ACTL6A*-V5 into BAF complexes as endogenous *ACTL6A*. (C) Co-IP by V5 antibody as (B). Note endogenous *ACTL6A* does not bind V5-tagged *ACTL6A*. (D) Density sedimentation and immunoblots for nuclear extracts from SCC cells. Note *ACTL6A* co-migrated with SMARCA4 marking BAF complexes in high molecular mass fractions 16-17 as a full complex. EZH2: subunit of PRC2 complexes as a control.

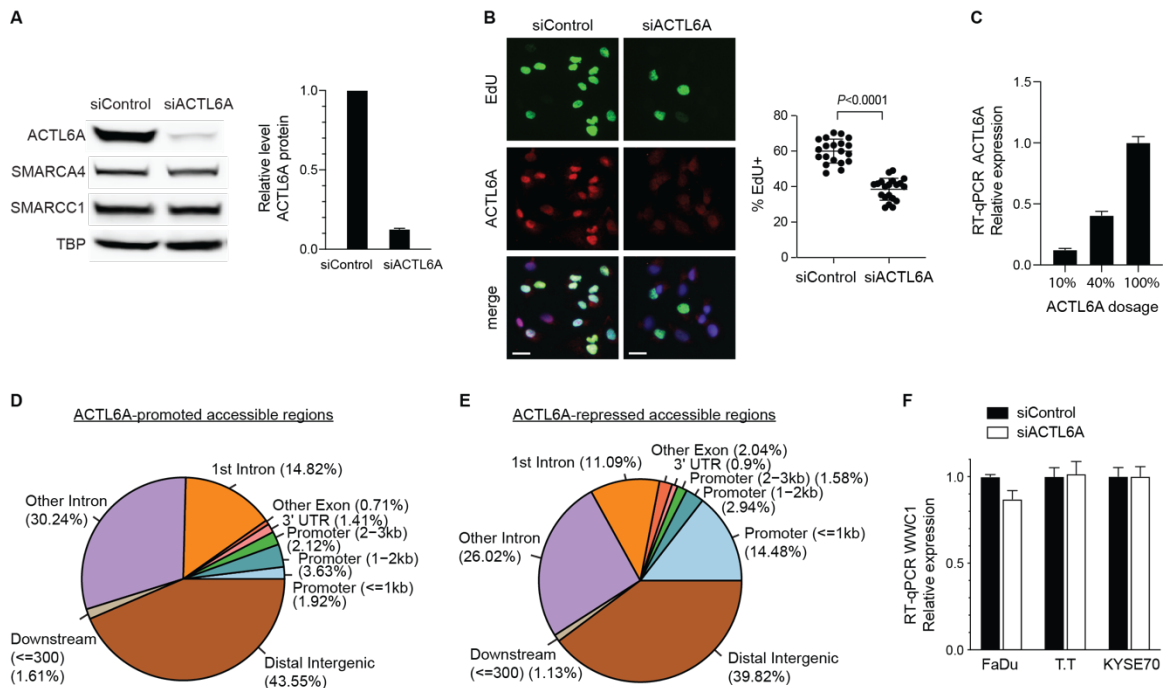

**Figure S2. ATAC-seq analyses identify accessible chromatin regions regulated by ACTL6A in SCC cells. Related to Figure 3.**

(A) Western blots for cell lysates from FaDu SCC cells 72h after transfection with *ACTL6A* siRNA (siACTL6A) or control siRNA (siControl). Quantifications of ACTL6A protein levels in siACTL6A relative to siControl cells. TBP: TATA-box-binding protein as loading control. (B) Immunostaining showing decreased SCC cell proliferation in response to *ACTL6A* knockdown. Assessment by the incorporation of EdU (5-ethynyl-2'-deoxyuridine) applied 1.5h before analysis, 72 hours after siRNA transfection. Quantifications: % of EdU+ cells. Scale bars: 20  $\mu$ m. Mean  $\pm$  SEM. (C) RT-qPCR showing *ACTL6A* intermediate- and high- level knockdown conditions upon different *ACTL6A* siRNA doses (40% or 10% remaining *ACTL6A*) relative to siControl (100%) used in Figure 3B and 3C. Mean  $\pm$  SEM. (D) Annotation pie chart of regions with decreased accessibility by siACTL6A compared to siControl in FaDu SCC cells from ATAC-seq analysis. (E) As in (D) for regions with increased accessibility by siACTL6A compared to siControl. (F) Transcription factor (TF) motif enrichment within regions with increased accessibility in siACTL6A versus siControl FaDu cells. Matches: number of peaks containing matched TF binding motifs. (F) RT-qPCR showed no significant changes in *WWC1* expression levels 72 hours after siACTL6A transfection compared to siControl in three SCC cell lines. Mean  $\pm$  SEM. \* $P < 0.05$ .

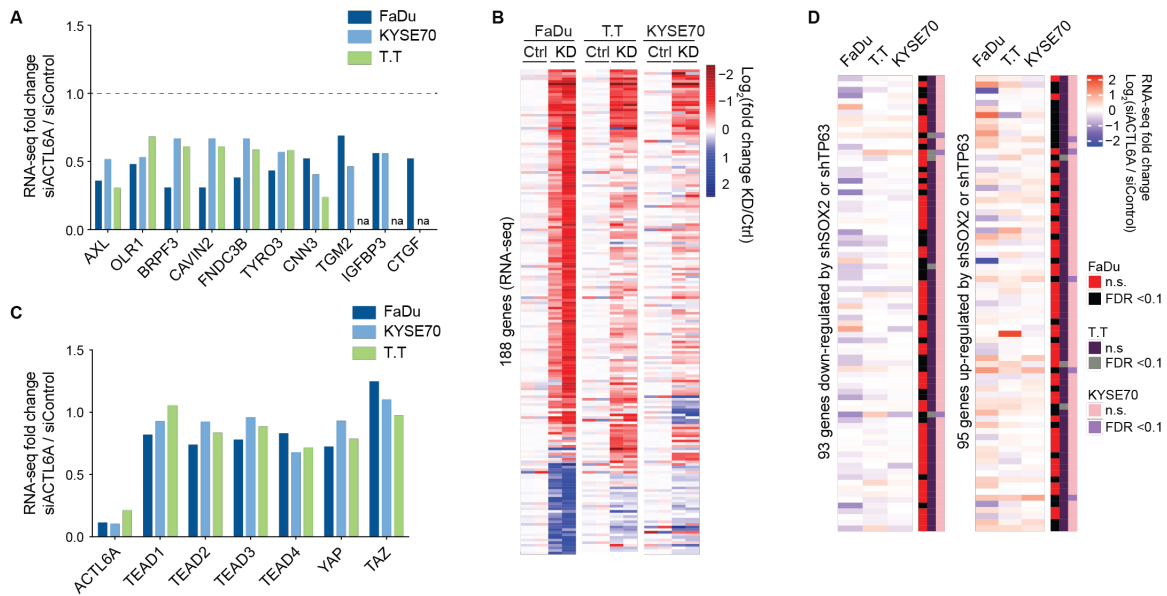

**Figure S3. Transcriptome analyses by RNA-seq reveal ACTL6A regulates the expression of YAP target genes and a distinct set of genes from SOX2 and TP63. Related to Figure 3.**

(A) Relative expression levels of YAP target genes from RNA-seq analyses between siACTL6A siControl in three SCC cell lines. na: not available (not expressed). (B) Hierarchical clustering of RNA-seq analyses showing 188 genes with differential expression between siACTL6A (KD) and siControl (Ctrl) in at least two of three SCC cell lines. FDR < 0.05. (C) Relative expression levels of YAP, TAZ, TEAD1-4 from RNA-seq analyses in siACTL6A cells normalized to siControl values. (D) Heat maps showing the RNA level fold-changes between siACTL6A versus siControl in three SCC cell lines across SOX2 and TP63 co-regulated genes. SOX2 shRNA (shSOX2) or TP63 shRNA (shTP63) knockdown experiments (Watanabe et al., 2014) were done in KYSE70 SCC cell line. Binary code on the right: FDR < 0.1 or not significant (n.s.).

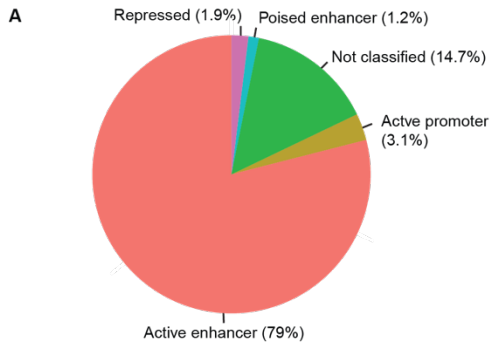

**B**  
6,251 joint peaks between YAP, TEAD1 and SMARCC1 CUT&RUN

| Rank | Motif | P-value               | % of Targets | Best Match        |
|------|-------|-----------------------|--------------|-------------------|
| 1    |       | $1 \times 10^{-1146}$ | 64.49%       | TEAD4 (TEA)       |
| 2    |       | $1 \times 10^{-265}$  | 55.22%       | Fos (bZIP)        |
| 3    |       | $1 \times 10^{-58}$   | 28.08%       | NEUROG2           |
| 4    |       | $1 \times 10^{-39}$   | 11.45%       | POL009.1_DCE_S_II |
| 5    |       | $1 \times 10^{-30}$   | 14.33%       | TFAP2E            |

**C**  
40,551 peaks from SMARCC1 CUT&RUN

| Rank | Motif | P-value               | % of Targets | Best Match  |
|------|-------|-----------------------|--------------|-------------|
| 1    |       | $1 \times 10^{-5642}$ | 56.09%       | FOSL2::JUNB |
| 2    |       | $1 \times 10^{-444}$  | 6.79%        | Sp2(Zf)     |
| 3    |       | $1 \times 10^{-126}$  | 20.94%       | TEAD(TEA)   |
| 4    |       | $1 \times 10^{-123}$  | 6.59%        | NFY(CCAAT)  |
| 5    |       | $1 \times 10^{-112}$  | 46.26%       | TFAP2A      |

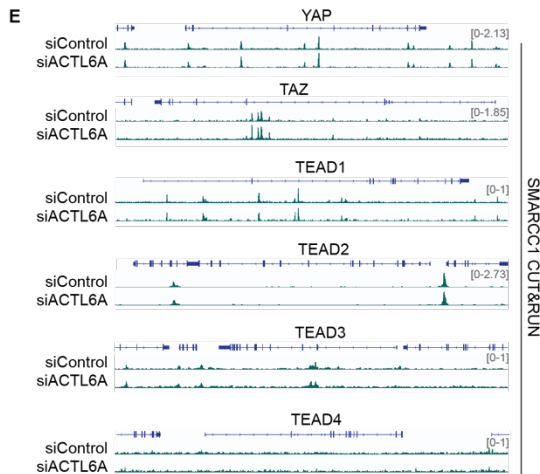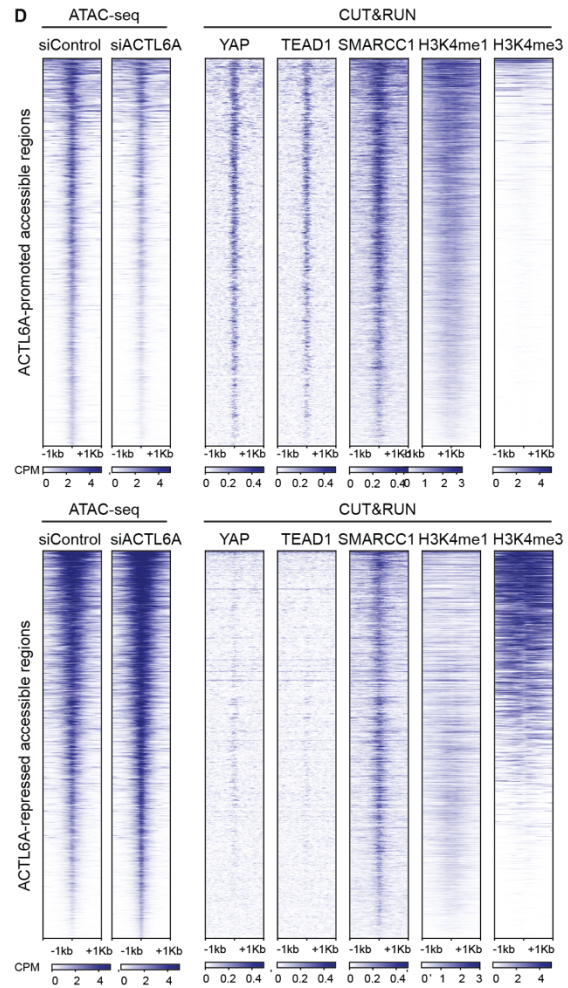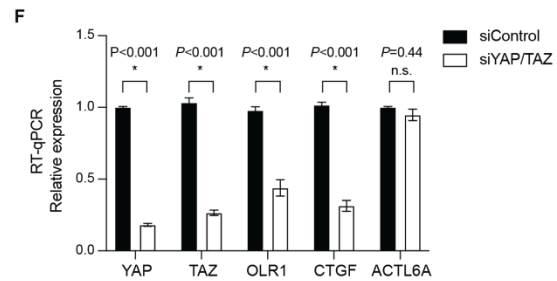

**Figure S4. CUT&RUN profiling reveals the co-localization of YAP, TEAD1 and BAF complexes on chromatin in SCC cells. Related to Figure 4.**

(A) Distribution of YAP, TEAD1 and BAF-subunit SMARCC1 co-occupied regions identified by CUT&RUN in FaDu SCC cells. Classification is based on the presence of histone marks identified by CUT&RUN: active enhancers- H3K27Ac<sup>+</sup> H3K4me1<sup>+</sup> (79 %); poised enhancers- H3K4me1<sup>+</sup> H3K27me3<sup>+</sup> (1.2 %); active promoters- H3K4me3<sup>+</sup> H3K27me3<sup>-</sup> (3.1 %); poised promoter- H3K4me3<sup>+</sup> H3K27me3<sup>+</sup> (0 %); repressed- H3K27me3<sup>+</sup> (1.9 %). (B) *De novo* motif analysis by HOMER for regions co-bound by YAP, TEAD1 and SMARCC1 identified by CUT&RUN. (C) As in (B), for regions bound by SMARCC1. (D) Heat maps for ATAC-seq and indicated CUT&RUN profiles around regions with decreased accessibility (top) and increased accessibility (bottom) in siACTL6A relative to siControl FaDu SCC cells. H3K4me1: enhancer histone mark. H3K4me3: active promoter histone mark. (E) SMARCC1 CUT&RUN peaks across *YAP*, *TAZ*, *TEAD1-4* loci unaltered upon *ACTL6A* knockdown (siACTL6A) compared to control (siControl). (F) RT-qPCR showing relative expression of indicated genes in FaDu SCC cells 48 hours after transfection of *YAP/TAZ* siRNA (siYAP/TAZ) and control siRNA (siControl). Normalized to siControl condition. \**P* < 0.05. n.s.: not significant.

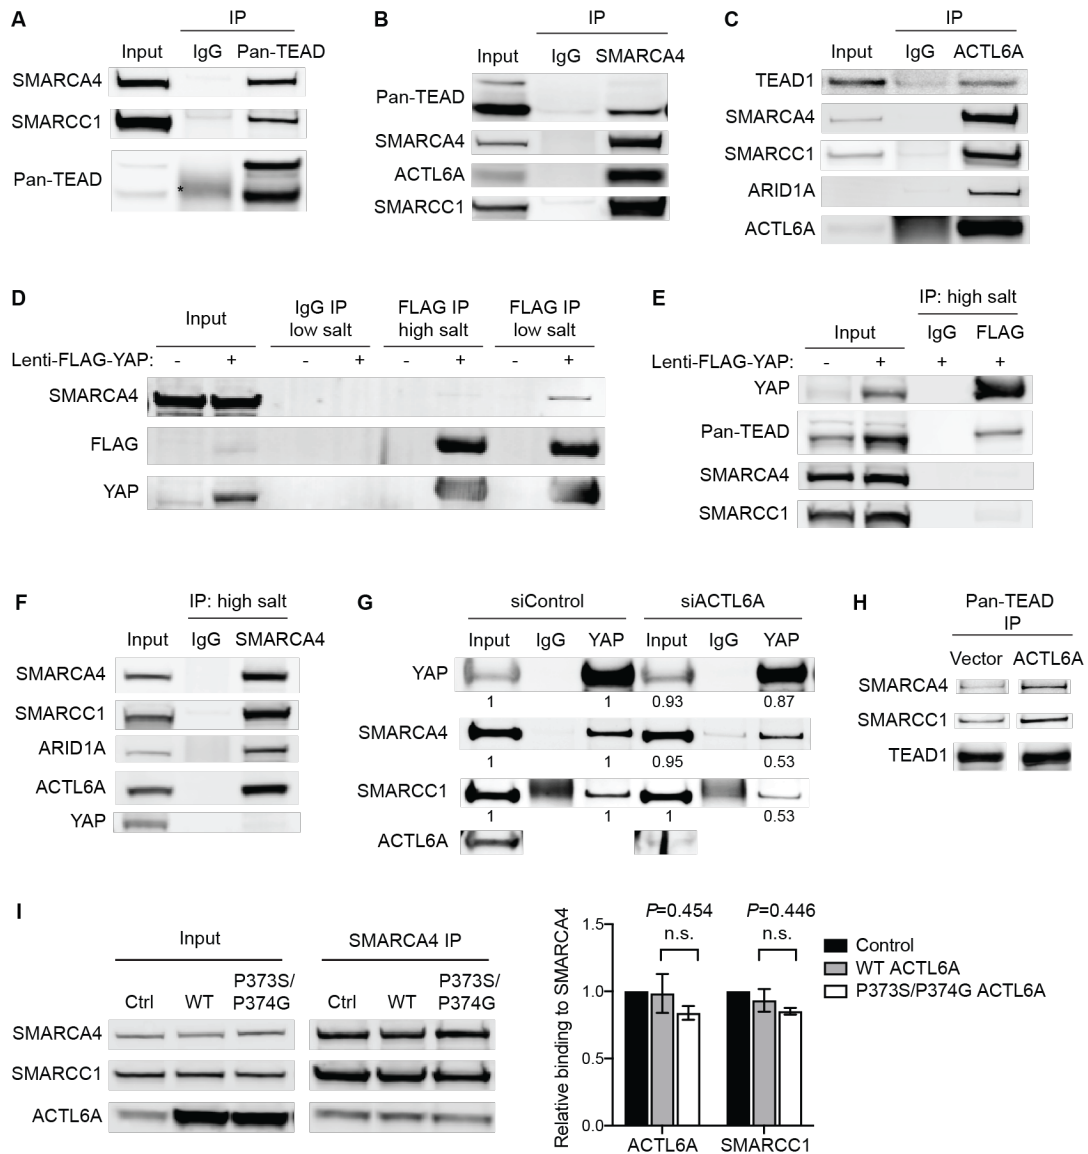

**Figure S5. ACTL6A provides surfaces on the BAF complex for TEAD-YAP binding. Related to Figure 5.**

(A-C) Co-IP experiments by Pan-TEAD (A), SMARCA4 (B), ACTL6A (C) antibodies with control IgG using nuclear extracts from FaDu SCC cells. \*IgG heavy chain. (D) Co-IP experiments by FLAG antibody using nuclear extracts from HEK293T cells transduced by lentivirus expressing FLAG-YAP or empty control. Note the high-salt (500mM) buffer condition abolished the binding between FLAG-YAP and BAF-subunit SMARCA4 and SMARCC1 compared to low-salt (100mM) condition used in (A-C). (E) Purification of FLAG-YAP for the *in vitro* binding assay by FLAG IP under the high-salt condition. Blots showed TEAD proteins were co-precipitated with YAP but not BAF subunits. (F) Purification of BAF complexes for the *in vitro* binding assay by IP using SMARCA4 antibody under the high-salt condition. Blots showed BAF subunits were co-IP'd with SMARCA4 but not YAP. (G) Co-IP by YAP and control IgG antibodies using nuclear extracts from FaDu cells 72 hours after transfection with siACTL6A and siControl. Relative levels normalized to siControl condition. (H) Co-IP experiments by Pan-TEAD antibody in primary human keratinocytes transduced by lentivirus overexpressing ACTL6A and the vector control. Note increased binding of BAF subunit SMARCA4 and SMARCC1 to TEAD. Mouse TEAD1 antibody

used for blotting to avoid TEAD signals masked by rabbit Pan-TEAD antibody heavy chain signals. (l) Co-IP by SMARCA4 antibody in nuclear extract from FaDu cells. WT: reconstituting WT *ACTL6A* into *ACTL6A* CRISPR-KO cells. P373S/P374G: reconstituting P373S/P374G *ACTL6A* into *ACTL6A* CRISPR-KO cells. Ctrl: lentiviral CRISPR control vector. Quantifications: relative levels of co-IP'd *ACTL6A* and *SMARCC1* in WT and P373S/P374G conditions normalized to ctrl. n=2 experiments. Error bars indicate SEM. n.s.: not significant.



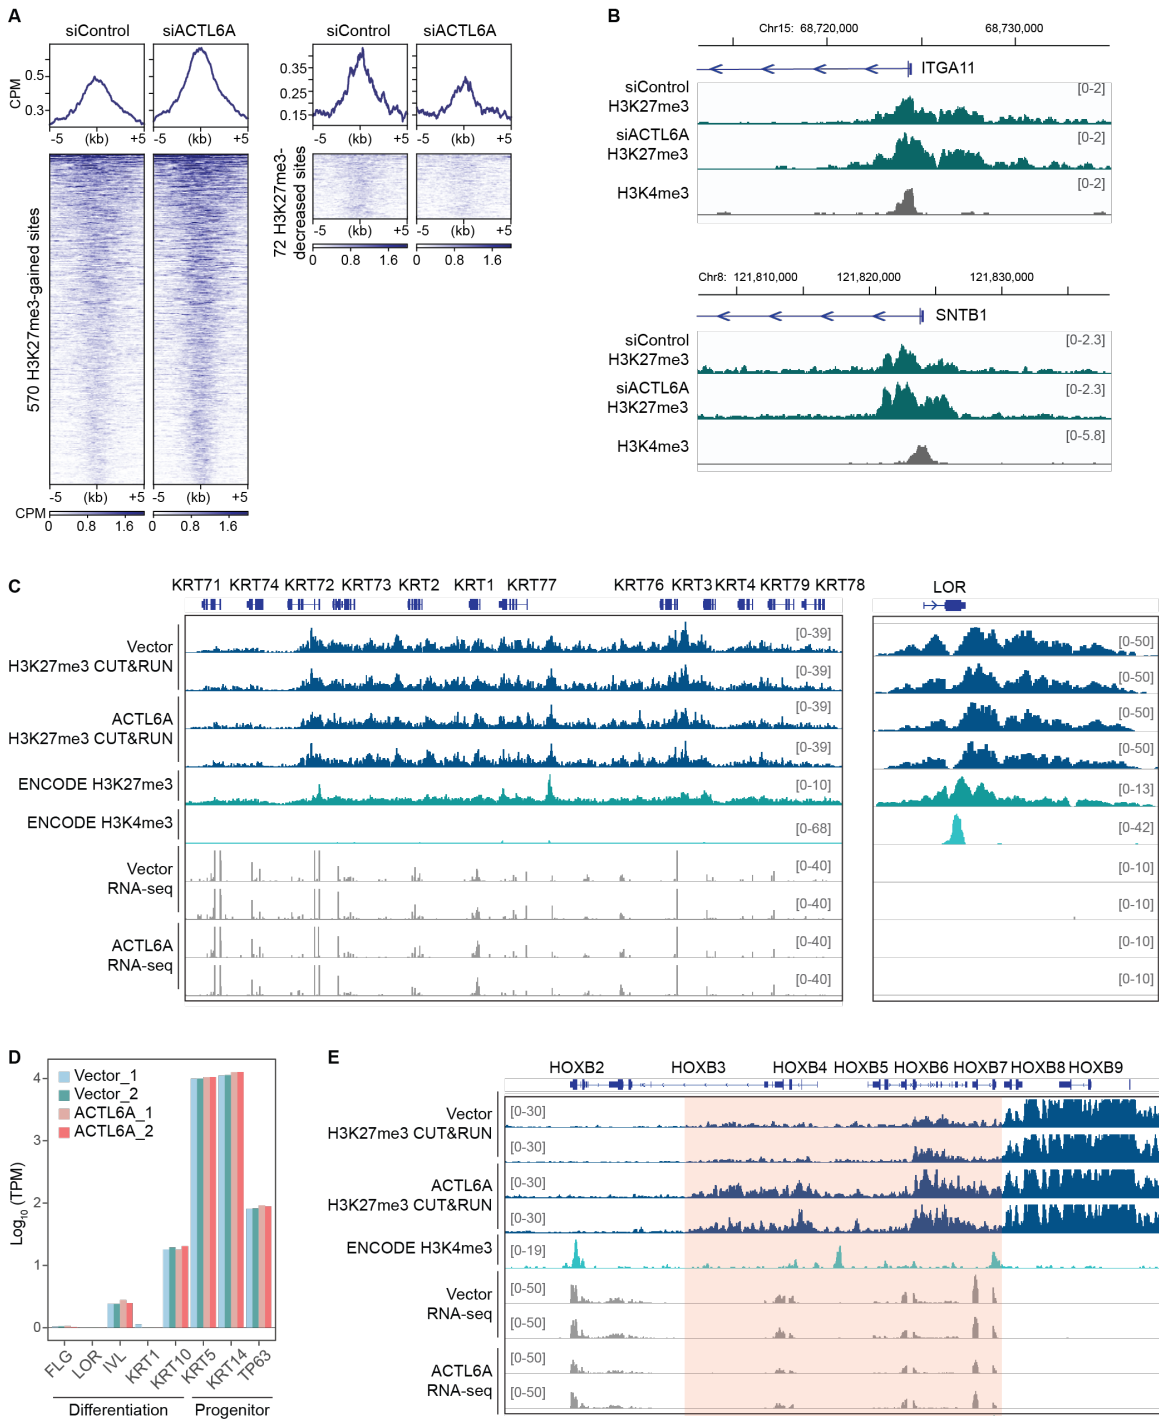

**Figure S6. Genome-wide profiling of H3K27me3 modifications by CUT&RUN identifies regions with altered H3K27me3 domains upon *ACTL6A* knockdown and overexpression. Related to Figure 6.**

(A) Heat maps and profiles of H3K27me3 CUT&RUN across H3K27me3-gained (left) and H3K27me3-reduced (right) regions in FaDu SCC cells 72 hours after si*ACTL6A* and siControl transfection. CPM: counts per million. (B) Genome browser tracks of H3K27me3 CUT&RUN upon *ACTL6A* knockdown. (C) Genome browser tracks of H3K27me3 CUT&RUN and RNA-seq profiles at keratinocyte-differentiation gene *KRT1* and its nearby genes (left), and *LOR* (right) in primary human keratinocytes transduced by lentivirus overexpressing *ACTL6A* and the vector control. Also shown were H3K27me3 and H3K4me3 CHIP-seq tracks in keratinocytes from ENCODE datasets. (D) Expression levels (transcripts per million, TPM) of keratinocyte differentiation genes and progenitor markers between *ACTL6A*-overexpressed and vector-control keratinocytes. (E) Genome browser tracks as in (A) at the *HOXB* locus.

**SUPPLEMENTAL TABLES**

**Table S1. qPCR primers used in this study. Related to Figures 3.**

| <b>Gene (human)</b> | <b>Forward primer</b>   | <b>Reverse primer</b>   |
|---------------------|-------------------------|-------------------------|
| <b>ACTL6A</b>       | AGTGGCAGGAGGAAACACAC    | CCCAAAGAGGCTAGAATGGA    |
| <b>YAP</b>          | GCACCTCTGTGTTTTAAGGGTCT | CAACTTTTGCCCTCCTCCAA    |
| <b>TAZ</b>          | GGCTGGGAGATGACCTTCAC    | CTGAGTGGGGTGGTTCTGCT    |
| <b>PPIB</b>         | CGTCTTCTTCCTGCTGCTG     | AGCCAAATCCTTTCTCTCCTG   |
| <b>WWC1</b>         | TCTACCAGGTGAAGCAGCAG    | GCTGGATGATGAACCAGAGAC   |
| <b>CTGF</b>         | AGGAGTGGGTGTGTGACGA     | CCAGGCAGTTGGCTCTAATC    |
| <b>AXL</b>          | CACCAGCAAGAGCGATGTGT    | CGGTCCTGGGGATTTAGCTC    |
| <b>OLR1</b>         | TTGCCTGGGATTAGTAGTGACC  | GCTTGCTCTTGTGTTAGGAGGT  |
| <b>TGM2</b>         | GGCACCAAGTACCTGCTCA     | AGAGGATGCAAAGAGGAACG    |
| <b>BRPF3</b>        | GGAAGGTGTGAACGGAGACT    | GTCTCCGCGGTCTTCAA       |
| <b>CAVIN2</b>       | GGCAGGTATGACAGCTTACGG   | GTTGTCCACCGGCTGTAATGT   |
| <b>IGFBP3</b>       | AGAGCACAGATACCCAGAACT   | GGTGATTCAGTGTGTCTTCCATT |
| <b>FNDC3B</b>       | GAGCATGCTGCATCAGTACC    | GTGCGAACAGGGAGACTTTC    |
| <b>TYRO3</b>        | GAGAGGAACTACGAAGATCGGG  | AGTGCTTGAAGGTGAACAGTG   |
| <b>CNN3</b>         | GGCAGGTATGACAGCTTACGG   | GTTGTCCACCGGCTGTAATGT   |
